# Supplementary material for: Curcumin effect on Acanthamoeba triangularis encystation under nutrient starvation
Source: PeerJ. 2022 Jul 4;10:e13657. doi: 10.7717/peerj.13657 (PMC9261923; doi:10.7717/peerj.13657)
Supplement: Supplemental Information 2 — Includes cell counting, analysis by microscopic examination prior to calculating the percentage, and the transcriptional expression data by qPCR. [file peerj-10-13657-s002.xlsx]

## Sheet: Fig 1
(A) %Acanthamoeba cyst
					Percentage
2020-09-14	n=1
PYG	Full				PYG	Full
0	1	160			0	0.625
6	0	220			6	0
12	0	220			12	0
18	1	250			18	0.4
24	0	240			24	0
2020-09-14	n=2
PYG	Full				PYG	Full
0	0	200			0	0
6	0	300			6	0
12	0	280			12	0
18	2	290			18	0.689655
24	0	300			24	0
2020-10-05	n=3				Percentage %
PYG	Full				PYG	Full
0	0	240			0	0
6	0	190			6	0
12	0	205			12	0
18	4	221			18	1.80995
24	4	281			24	1.42349
2020-10-05	n=4
PYG	Full				PYG	Full
0	0	220			0	0
6	0	270			6	0
12	0	220			12	0
18	0	284			18	0
24	3	256			24	1.17188
2021-01-24	n=1
PAS	Starved				PAS	Starved
0	0	225			0	0
6	0	210			6	0
12	23	220			12	10.4545
18	67	220			18	30.4545
24	114	200			24	57
2021-01-30	n=2
PAS	Starved				PAS	Starved
0	0	200			0	0
6	0	230			6	0
12	19	225			12	8.44444
18	51	205			18	24.878
24	102	200			24	51
2021-01-30	n=3
PAS	Starved				PAS	Starved
0	0	250			0	0
6	0	220			6	0
12	25	240			12	10.4167
18	67	235			18	28.5106
24	109	210			24	51.9048

## Sheet: Fig 2 + Fig S3
(A) %Acanthamoeba cyst
															Percentage
2021-01-24	n=1
PAS	Starved		S+WM		S+3MA		S+CC		S+CC+WM		S+CC+3MA				PAS	Starved	S+WM	S+3MA	S+CC	S+CC+WM	S+CC+3MA
0	0	225	0	200	0	250	0	200	0	230	0	205			0	0	0	0	0	0	0
6	0	210	0	201	0	220	0	220	0	220	0	215			6	0	0	0	0	0	0
12	23	220	17	225	1	210	0	225	0	200	0	230			12	10.4545	7.55556	0.47619	0	0	0
18	67	220	61	250	29	200	1	230	2	220	4	220			18	30.4545	24.4	14.5	0.434783	0.909091	1.81818
24	114	200	90	200	41	220	3	210	3	220	2	240			24	57	45	18.6364	1.42857	1.36364	0.833333
2021-01-30	n=2
PAS	Starved		S+WM		S+3MA		S+CC		S+CC+WM		S+CC+3MA				PAS	Starved	S+WM	S+3MA	S+CC	S+CC+WM	S+CC+3MA
0	0	200	0	210	0	200	0	220	0	240	0	210			0	0	0	0	0	0	0
6	0	230	0	250	0	210	0	220	0	235	0	220			6	0	0	0	0	0	0
12	19	225	21	200	3	220	0	225	1	220	0	220			12	8.44444	10.5	1.36364	0	0.454545	0
18	51	205	44	200	26	200	2	200	3	210	2	210			18	24.878	22	13	1	1.42857	0.952381
24	102	200	67	210	59	210	4	230	3	220	3	225			24	51	31.9048	28.0952	1.73913	1.36364	1.33333
2021-01-30	n=3
PAS	Starved		S+WM		S+3MA		S+CC		S+CC+WM		S+CC+3MA				PAS	Starved	S+WM	S+3MA	S+CC	S+CC+WM	S+CC+3MA
0	0	250	0	230	0	240	0	210	0	220	0	210			0	0	0	0	0	0	0
6	0	220	0	220	0	205	0	220	1	225	0	200			6	0	0	0	0	0.444444	0
12	25	240	15	220	1	230	0	230	0	230	0	225			12	10.4167	6.81818	0.434783	0	0	0
18	67	235	49	200	17	220	3	235	2	250	3	230			18	28.5106	24.5	7.72727	1.2766	0.8	1.30435
24	109	210	95	200	46	220	2	200	3	255	2	215			24	51.9048	47.5	20.9091	1	1.17647	0.930233
(C) %Trophozoite with enlarged vacuoles
2021-01-24	n=1													Percentage
PAS	Starved				S+CC				S+3MA					Starved		S+CC		S+3MA
	Irregular	Trop+vac	Trop+En vac	Total	Irregular	Trop+vac	Trop+En vac	Total	Irregular	Trop+vac	Trop+En vac	Total		%Trop+vac	%Trop+En vac	%Trop+vac	%Trop+En vac	%Trop+vac	%Trop+En vac
0	222	217	19	225	196	190	16	200	246	239	25	250		97.7477	8.55856	96.9388	8.16327	97.1545	10.1626
6	199	185	33	210	217	215	23	220	207	202	23	220		92.9648	16.5829	99.0783	10.5991	97.5845	11.1111
12	150	146	29	220	217	211	27	225	176	174	16	210		97.3333	19.3333	97.235	12.4424	98.8636	9.09091
18	107	98	25	220	225	219	24	230	122	116	9	200		91.5888	23.3645	97.3333	10.6667	95.082	7.37705
24	45	43	10	200	201	200	28	210	126	122	8	220		95.5556	22.2222	99.5025	13.9303	96.8254	6.34921
2021-01-30	n=2
PAS	Starved				S+CC				S+3MA					Starved		S+CC		S+3MA
	Irregular	Trop+vac	Trop+En vac	Total	Irregular	Trop+vac	Trop+En vac	Total	Irregular	Trop+vac	Trop+En vac	Total		%Trop+vac	%Trop+En vac	%Trop+vac	%Trop+En vac	%Trop+vac	%Trop+En vac
0	197	195	15	200	217	210	19	220	195	191	18	200		98.9848	7.61421	96.7742	8.75576	97.9487	9.23077
6	210	212	29	230	218	215	17	220	202	194	22	210		100.952	13.8095	98.6239	7.79817	96.0396	10.8911
12	156	138	30	225	219	211	31	225	179	170	15	220		88.4615	19.2308	96.347	14.1553	94.9721	8.37989
18	101	90	19	205	194	184	22	200	117	109	10	200		89.1089	18.8119	94.8454	11.3402	93.1624	8.54701
24	40	37	8	200	222	215	25	230	88	85	6	210		92.5	20	96.8468	11.2613	96.5909	6.81818
2021-01-30	n=3
PAS	Starved				S+CC				S+3MA					Starved		S+CC		S+3MA
	Irregular	Trop+vac	Trop+En vac	Total	Irregular	Trop+vac	Trop+En vac	Total	Irregular	Trop+vac	Trop+En vac	Total		%Trop+vac	%Trop+En vac	%Trop+vac	%Trop+En vac	%Trop+vac	%Trop+En vac
0	248	239	21	250	207	206	14	210	232	221	19	240		96.371	8.46774	99.5169	6.76329	95.2586	8.18966
6	203	199	27	220	215	213	29	220	186	184	20	205		98.0296	13.3005	99.0698	13.4884	98.9247	10.7527
12	162	161	22	240	223	221	22	230	188	182	8	230		99.3827	13.5802	99.1031	9.86547	96.8085	4.25532
18	119	115	25	235	228	222	26	235	138	130	10	220		96.6387	21.0084	97.3684	11.4035	94.2029	7.24638
24	44	40	11	210	192	190	20	200	97	93	7	220		90.9091	25	98.9583	10.4167	95.8763	7.21649
(D) Transcriptional expression (Fold change)
PAS (Starvation)
	S+3MA_A3-6	S+3MA_A3-12	S+3MA_A3-18	S+3MA_A3-24	S+3MA_A8b-6	S+3MA_A8b-12	S+3MA_A8b-18	S+3MA_A8b-24	S+3MA_A12-6	S+3MA_A12-12	S+3MA_A12-18	S+3MA_A12-24	S+3MA_A16-6	S+3MA_A16-12	S+3MA_A16-18	S+3MA_A16-24	Control Time 0	S+CC_A3-6	S+CC_A3-12	S+CC_A3-18	S+CC_A3-24	S+CC_A8b-6	S+CC_A8b-12	S+CC_A8b-18	S+CC_A8b-24	S+CC_A12-6	S+CC_A12-12	S+CC_A12-18	S+CC_A12-24	S+CC_A16-6	S+CC_A16-12	S+CC_A16-18	S+CC_A16-24
n=1	0.1764	0.3368	0.0524	1.1939	0.218	0.2581	0.079	0.7268	2.4344	0.3495	2.2191	1.6061	0.4706	0.0903	2.2105	1.7157	1	1.933	1.0302	35.3895	22.4786	5.193	1.3867	27.7142	12.8749	4.7216	1.1142	0.7292	0.7054	0.8846	0.381	0.3528	0.6743
n=2	0.9023	3.9218	1.0986	0.4555	0.5881	3.6834	0.5882	0.1733	1.3013	0.4335	0.6167	1.3991	0.3582	0.6122	0.8627	1.6337	1	6.1406	13.356	0.3981	0.2574	5.2291	5.2548	0.3957	0.1751	0.4585	2.5394	0.2182	0.3505	1.5708	NA	0.2443	0.301
n=3	9.1797	0.8401	0.9035	0.1186	4.2068	0.7272	0.2326	0.1	1.3327	0.3411	1.1218	0.3537	1.2833	0.7034	0.9801	0.543	1	2.379	9.9908	1.2035	3.9863	0.8929	1.8564	1.3195	1.825	1.2896	0.7842	0.5828	2.0669	5.1749	20.6641	0.3318	1.0642
n=4	ND	ND	ND	ND	ND	ND	ND	ND	ND	ND	ND	ND	ND	ND	ND	ND	1	0.447919	1.43653	0.549491	0.9635	0.157363	0.827506	0.528783	0.938188	0.984968	0.772569	0.209414	0.539968	0.367975	0.966682	1.00196	0.281349
	ATG3				ATG8b				ATG12				ATG16					ATG3				ATG8b				ATG12				ATG16
	*ND, Not done

## Sheet: Fig 3+Fig 4+Fig S3+Fig S6
(A) %Acanthamoeba cyst
							Percentage
2020-09-14	n=1
PYG	Full		F+CC				PYG	Full	F+CC
0	1	160	0	220			0	0.625	0
6	0	220	1	250			6	0	0.4
12	0	220	0	200			12	0	0
18	1	250	2	275			18	0.4	0.727273
24	0	240	2	300			24	0	0.666667
2020-09-14	n=2
PYG	Full		F+CC				PYG	Full	F+CC
0	0	200	1	240			0	0	0.416667
6	0	300	0	350			6	0	0
12	0	280	1	300			12	0	0.333333
18	2	290	6	230			18	0.689655	2.6087
24	0	300	7	300			24	0	2.33333
2020-10-05	n=3						Percentage %
PYG	Full		F+CC				PYG	Full	F+CC
0	0	240	0	220			0	0	0
6	0	190	0	210			6	0	0
12	0	205	0	225			12	0	0
18	4	221	3	250			18	1.80995	1.2
24	4	281	0	241			24	1.42349	0
2020-10-05	n=4
PYG	Full		F+CC				PYG	Full	F+CC
0	0	220	0	190			0	0	0
6	0	270	1	245			6	0	0.408163
12	0	220	1	240			12	0	0.416667
18	0	284	5	225			18	0	2.22222
24	3	256	2	209			24	1.17188	0.956938
(C) %Trophozoite with enlarged vacuoles
2020-09-14	n=1									Percentage
PYG	Full				F+CC					Full		F+CC
	Irregular	Trop+vac	Trop+En vac	Total	Irregular	Trop+vac	Trop+En vac	Total		%Trop+vac	%Trop+En vac	%Trop+vac	%Trop+En vac
0	157	157	15	160	211	210	16	220		100	9.55414	99.5261	7.58294
6	211	210	23	220	248	246	19	250		99.5261	10.9005	99.1935	7.66129
12	216	216	23	220	199	196	8	200		100	10.6481	98.4925	4.0201
18	239	236	13	250	270	267	16	275		98.7448	5.43933	98.8889	5.92593
24	238	233	17	240	296	295	23	300		97.8992	7.14286	99.6622	7.77027
2020-09-14	n=2
PYG	Starved				F+CC					Full		F+CC
	Irregular	Trop+vac	Trop+En vac	Total	Irregular	Trop+vac	Trop+En vac	Total		%Trop+vac	%Trop+En vac	%Trop+vac	%Trop+En vac
0	195	191	11	200	234	231	16	240		97.9487	5.64103	98.7179	6.83761
6	291	288	18	300	339	334	19	350		98.9691	6.18557	98.5251	5.60472
12	273	270	14	280	295	293	20	300		98.9011	5.12821	99.322	6.77966
18	278	273	21	290	225	220	11	230		98.2014	7.55396	97.7778	4.88889
24	289	281	26	300	298	296	14	300		97.2318	8.99654	99.3289	4.69799
2020-10-05	n=3
PYG	Starved				F+CC					Full		F+CC
	Irregular	Trop+vac	Trop+En vac	Total	Irregular	Trop+vac	Trop+En vac	Total		%Trop+vac	%Trop+En vac	%Trop+vac	%Trop+En vac
0	233	229	20	240	216	212	13	220		98.2833	8.58369	98.1481	6.01852
6	186	182	21	190	209	209	12	210		97.8495	11.2903	100	5.74163
12	196	194	19	205	222	220	18	225		98.9796	9.69388	99.0991	8.10811
18	220	211	28	221	241	241	19	250		95.9091	12.7273	100	7.88382
24	277	274	17	281	235	234	15	241		98.917	6.13718	99.5745	6.38298
(D) Transcriptional expression (Fold change)
PYG (Nutrient-rich condition)
	A3-6	A3-12	A3-18	A3-24	A8b-6	A8b-12	A8b-18	A8b-24	A12-6	A12-12	A12-18	A12-24	A16-6	A16-12	A16-18	A16-24	Control Time 0	CLLS-6	CLLS-12	CLLS-18	CLLS-24	SP2-6	SP2-12	SP2-18	SP2-24	MCA-6	MCA-12	MCA-18	MCA-24	IL1CE-6	IL1CE-12	IL1CE-18	IL1CE-24
n=1	1.1212	0.5517	0.1412	2.7872	0.5264	0.1613	0.4601	1.8864	4.1038	0.2412	1.0478	0.6169	3.3156	0.7056	2.0351	18.3887	1	6.2339	3.6227	15.3613	40.3705	4.8094	2.3062	0.3616	36.6384	1.487	0.4795	1.1939	5.7939	2.7281	0.7776	0.5417	24.2558
n=2	1.6511	1.3684	1.6559	0.3485	0.9633	0.6731	3.3041	1.8387	1.9799	1.3629	NA	0.6638	1.5708	1.5624	45.5656	0.6811	1	11.1972	5.6926	6.8752	NA	3.2202	1.9545	1.3094	NA	0.6199	0.6406	3.4147	1.799	3.2356	0.8935	1.3862	0.122
n=3	1.2189	1.1041	0.5025	2.8943	1.837	0.6234	1.0539	11.2166	1.3127	1.1144	0.4625	1.1294	5.1749	1.3959	0.5388	86.832	1	0.2645	4.5309	5.3934	54.8194	0.2566	5.0969	0.7081	42.2691	1.4009	0.6614	3.9747	2.0111	2.8214	3.0609	1.889	96.9372
	ATG3				ATG8b				ATG12				ATG16					CL				SP				MCA				IL

## Sheet: Fig S1
IC50 Curcumin (Trophozoite 24h treatment); Representative data
n=1			n=2			n=3
Curcumin conc	Fluorescence intensity		Curcumin conc	Fluorescence intensity		Curcumin conc	Fluorescence intensity
8000	-1350.33		8000	-385.333		125	25029.3
4000	-1571.67		4000	-12.6667		62.5	25681.3
2000	-1382.33		2000	1685		31.25	30255.7
1000	612		1000	3200.67		15.625	30819
500	414		500	2136		7.8125	36031.3
250	5200		250	6261.33		3.90625	35672
125	9349.67		125	17295.3		1.95312	39457.3
62.5	15980.3		62.5	25003.7
31.25	23635		31.25	28802.3
15.625	27306.7		15.625	28997.7
7.8125	27640.7		7.8125	30237.7
3.90625	39449		3.90625	36578.3
1.95312	41444		1.95312	41889
0.976562	31993		0.976562	42640.7
0.488281	34292.5		0.488281	37372.3
0.244141	36284.7		0.244141	41596.7
0.12207	37453
0.0610352	39541
Curcumin IC50		1	2	3	Average	SD
Trophozoite	24h treatment	51.36	78.05	16.51	48.64	30.86

## Sheet: Fig S2
%Acanthamoeba forms
2021-01-24	n=1													Percentage
PAS	Starved				S+CC				S+3MA					Starved			S+CC			S+3MA
	Irregular trop	Rounded trop	Cyst	Total	Irregular trop	Rounded trop	Cyst	Total	Irregular trop	Rounded trop	Cyst	Total		%Irregular trop	%Rounded trop	%Cyst	%Irregular trop	%Rounded trop	%Cyst	%Irregular trop	%Rounded trop	%Cyst
0	222	3	0	225	196	4	0	200	246	4	0	250		98.6667	1.33333	0	98	2	0	98.4	1.6	0
6	199	11	0	210	217	3	0	220	207	13	0	220		94.7619	5.2381	0	98.6364	1.36364	0	94.0909	5.90909	0
12	150	47	23	220	217	8	0	225	176	33	1	210		68.1818	21.3636	10.4545	96.4444	3.55556	0	83.8095	15.7143	0.47619
18	107	46	67	220	225	4	1	230	122	49	29	200		48.6364	20.9091	30.4545	97.8261	1.73913	0.434783	61	24.5	14.5
24	45	41	114	200	201	6	3	210	126	53	41	220		22.5	20.5	57	95.7143	2.85714	1.42857	57.2727	24.0909	18.6364
2021-01-30	n=2
PAS	Starved				S+CC				S+3MA					Starved			S+CC			S+3MA
	Irregular trop	Rounded trop	Cyst	Total	Irregular trop	Rounded trop	Cyst	Total	Irregular trop	Rounded trop	Cyst	Total		%Irregular trop	%Rounded trop	%Cyst	%Irregular trop	%Rounded trop	%Cyst	%Irregular trop	%Rounded trop	%Cyst
0	197	3	0	200	217	3	0	220	195	5	0	200		98.5	1.5	0	98.6364	1.36364	0	97.5	2.5	0
6	210	20	0	230	218	2	0	220	202	8	0	210		91.3043	8.69565	0	99.0909	0.909091	0	96.1905	3.80952	0
12	156	50	19	225	219	6	0	225	179	38	3	220		69.3333	22.2222	8.44444	97.3333	2.66667	0	81.3636	17.2727	1.36364
18	101	53	51	205	192	6	2	200	117	57	26	200		49.2683	25.8537	24.878	96	3	1	58.5	28.5	13
24	40	58	102	200	215	11	4	230	88	63	59	210		20	29	51	93.4783	4.78261	1.73913	41.9048	30	28.0952
2021-01-30	n=3
PAS	Starved				S+CC				S+3MA					Starved			S+CC			S+3MA
	Irregular trop	Rounded trop	Cyst	Total	Irregular trop	Rounded trop	Cyst	Total	Irregular trop	Rounded trop	Cyst	Total		%Irregular trop	%Rounded trop	%Cyst	%Irregular trop	%Rounded trop	%Cyst	%Irregular trop	%Rounded trop	%Cyst
0	248	2	0	250	207	3	0	210	232	8	0	240		99.2	0.8	0	98.5714	1.42857	0	96.6667	3.33333	0
6	203	17	0	220	215	5	0	220	186	19	0	205		92.2727	7.72727	0	97.7273	2.27273	0	90.7317	9.26829	0
12	162	53	25	240	222	7	1	230	188	41	1	230		67.5	22.0833	10.4167	96.5217	3.04348	0.434783	81.7391	17.8261	0.434783
18	119	49	67	235	219	12	4	235	138	65	17	220		50.6383	20.8511	28.5106	93.1915	5.10638	1.70213	62.7273	29.5455	7.72727
24	44	57	109	210	180	16	4	200	97	77	46	220		20.9524	27.1429	51.9048	90	8	2	44.0909	35	20.9091	*Selected for a representative data
